# Supplementary material for: The ditungsten decacarbonyl dianion
Source: Royal Society of Chemistry journal article supplement (doi:10.1039/d0dt01921f), 2020-01-01
Supplement: d0dt01921f1.pdf [file d0dt01921f1.pdf]

- *Electronic Supplementary Information* -

## **The Ditungsten Decacarbonyl Dianion**

Joseph P. A. Ostrowski,<sup>†</sup> Benjamin E. Atkinson,<sup>†</sup> Laurence R. Doyle, Ashley J. Wooles, Nikolas Kaltsoyannis,\* and Stephen T. Liddle\*

Department of Chemistry, The University of Manchester, Oxford Road, Manchester, M13 9PL, UK.

\*E-mail: [steve.liddle@manchester.ac.uk](mailto:steve.liddle@manchester.ac.uk); [nikolas.kaltsoyannis@manchester.ac.uk](mailto:nikolas.kaltsoyannis@manchester.ac.uk)

<sup>†</sup> These authors contributed equally.

### **Experimental Details**

#### ***General Considerations***

All manipulations were carried out using Schlenk techniques, or an MBraun UniLab glovebox, under an atmosphere of dry nitrogen. Solvents were dried by passage through activated alumina towers and degassed before use. All solvents were stored over potassium mirrors except for ethers which were stored over activated 4 Å sieves. Deuterated solvent was distilled from potassium, degassed by three freeze-pump-thaw cycles and stored under nitrogen. Tungsten hexacarbonyl, potassium, naphthalene, and 18-crown-6 ether were purchased from Sigma Aldrich and dried for 4 hours under vacuum before use.

NMR spectra were acquired on a Bruker AV400 spectrometer operating at 400.2 (<sup>1</sup>H) and 100.6 (<sup>13</sup>C{<sup>1</sup>H}) MHz; chemical shifts are quoted in ppm and are relative to SiMe<sub>4</sub>. Attenuated total reflectance (ATR) infrared (IR) spectra were obtained using a Bruker Alpha Platinum-ATR FTIR spectrometer or a Thermo Scientific™ Nicolet™ iS™5 FTIR spectrometer with iD5 ATR

- *Electronic Supplementary Information* -

accessory. A Horiba XploRA Plus Raman microscope with a 638 nm laser (power:  $\leq 150$  mW) was used to obtain all Raman spectra. The power of the laser was adjusted for each sample using a filter to prevent sample decomposition. UV/Vis spectra were obtained using a PerkinElmer Lambda 750 spectrometer. All samples were prepared under a nitrogen atmosphere and collected using a 1 mm path length quartz cuvette. Samples were run vs. THF solvent. Electrochemical experiments were carried out using an  $\mu$ AutoLab Type III potentiostat controlled by Nova. Measurements were performed inside a sealed N<sub>2</sub> vessel at room temperature, and subsequently calibrated through the addition of ferrocene. A three-electrode configuration was employed: a Pt working electrode; a Pt wire counter electrode; and an Ag wire pseudo-reference electrode. All electrodes were polished using alumina/H<sub>2</sub>O. CHN microanalyses were carried out by Mr M Jennings at the University of Manchester. Crystals were examined using a Rigaku FR-X diffractometer, equipped with a HyPix 6000HE photon counting pixel array detector with mirror-monochromated Mo K $\alpha$  ( $\lambda = 0.71073$  Å) or Cu K $\alpha$  ( $\lambda = 1.5418$  Å) radiation. Intensities were integrated from a sphere of data recorded on narrow (1.0°) frames by  $\omega$  rotation. Cell parameters were refined from the observed positions of all strong reflections in each data set. Gaussian grid face-indexed absorption corrections with a beam profile correction were applied. The structures were solved either by dual methods using SHELXT<sup>1</sup> and all non-hydrogen atoms were refined by full-matrix least-squares on all unique  $F^2$  values with anisotropic displacement parameters with exceptions noted in the respective cif files. Hydrogen atoms were refined with constrained geometries and riding thermal parameters;  $U_{\text{iso}}(\text{H})$  was set at 1.2 (1.5 for methyl groups) times  $U_{\text{eq}}$  of the parent atom. The largest features in final difference syntheses were close to heavy atoms and were of no chemical significance. CrysAlisPro was used for control and integration,<sup>2</sup> and SHELXL and Olex2 were employed for structure refinement.<sup>3,4</sup> ORTEP-3 and POV-Ray were employed for molecular graphics.<sup>5,6</sup>

**Preparation of [(OC)<sub>5</sub>W-W(CO)<sub>5</sub>][K(18-crown-6)(THF)<sub>2</sub>]<sub>2</sub> (**1**)**

THF (20 ml) was added to a mixture of [W(CO)<sub>6</sub>] (0.704 g, 2.0 mmol) and 18-crown-6 (0.53 g, 2.0 mmol). THF (20 ml) was then added to a separate mixture of potassium metal (0.08 g, 2.0 mmol) and naphthalene (0.26 g, 2.0 mmol), and the mixture agitated until all the potassium was consumed. The completed potassium naphthalenide solution was added dropwise to the W(CO)<sub>6</sub> solution, instantaneously forming a red solution which was allowed to stir over 3 days, resulting in a brown solution. Volatiles were removed *in vacuo* and the resulting brown solid was washed with pentane (2 × 10 ml), then extracted into THF (5 ml) and filtered away from the remaining solid. Volatiles were removed *in vacuo* to afford **1** as a yellow powder. Crystals of **1** suitable for X-ray diffraction were grown from a concentrated THF solution at ambient temperature. Yield: 0.728 g, 58%. Extended drying under vacuum removes the THF as evidenced by the elemental analyses. Anal. Calc'd for C<sub>34</sub>H<sub>48</sub>K<sub>2</sub>O<sub>22</sub>W<sub>2</sub>: C 32.55; H 3.86%. Found: C 32.80; H 3.90%. <sup>1</sup>H NMR (500 MHz, d<sub>8</sub>-THF) δ: 3.64 (48H, s, CH<sub>2</sub>), 3.62 (16H, m, THF(O-CH<sub>2</sub>)), 1.78 (16H, m, THF(CH<sub>2</sub>-CH<sub>2</sub>)). <sup>13</sup>C{<sup>1</sup>H} NMR (d<sub>8</sub>-THF) δ: 222.86 (s, W-CO) 70.21 (s, O-CH<sub>2</sub>), 66.63 (THF(O-CH<sub>2</sub>)), 23.33 (THF(CH<sub>2</sub>-CH<sub>2</sub>)). FTIR ν/cm<sup>-1</sup> (ATR): 2905 (w), 1938 (m), 1863 (s), 1772 (s), 1467 (w), 1351 (w), 1095 (s), 959 (s), 833 (m), 576 (s). Raman ν/cm<sup>-1</sup> (Neat, ≤15 mW): 2019 (w), 1960 (br), 1904 (m), 1794 (w), 595 (w), 447 (s), 405 (m), 97 (vs).

**Experimental Data**

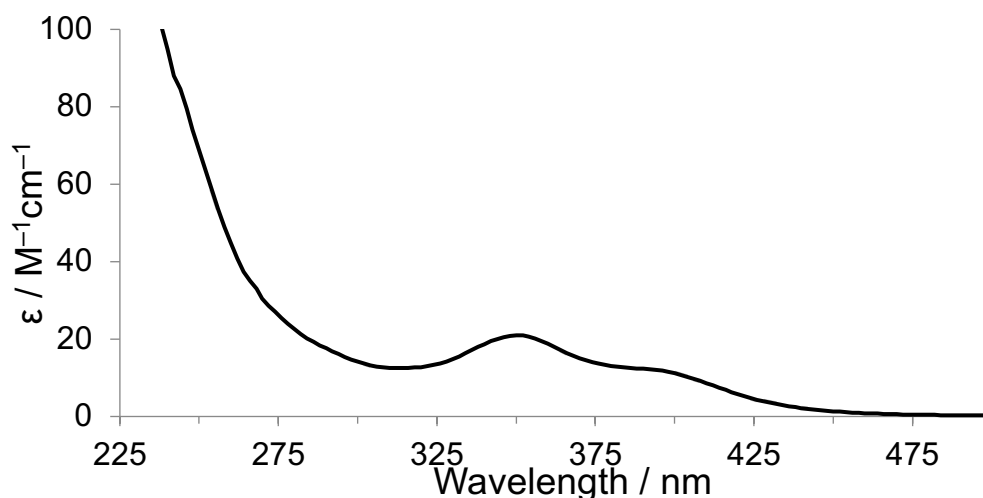

**Figure S1. UV/Vis spectrum of complex 1 in THF.**

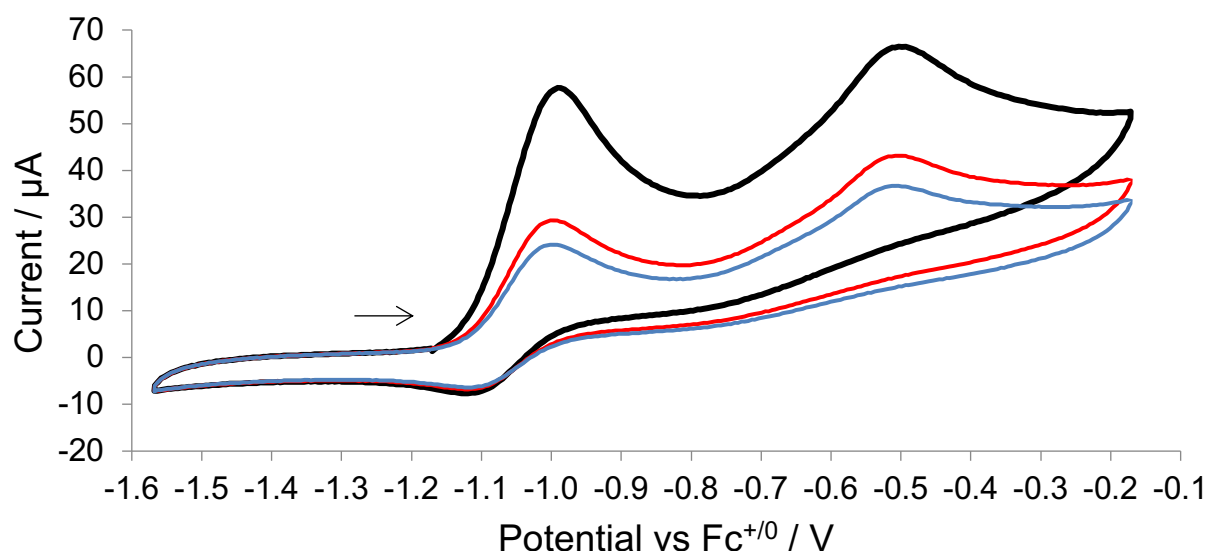

**Figure S2.** Cyclic voltammogram of **1** (0.42 mM) vs.  $\text{Fc}^{+/0}$  (2 mM), with  $[\text{nBu}_4\text{N}][\text{BF}_4]$  (0.5 M) as electrolyte, showing first (black), second (red) and third (blue) scans. Arrow shows scan directions.

## Computational Details

### General Considerations

All calculations were performed in Molpro 2018.2.<sup>7</sup> Calculations were performed at the density functional theory (DFT) level of theory, using the hybrid B3LYP<sup>8-11</sup> functional. DFT calculations included dispersion with Grimme's D3 dispersion correction, and Becke-Johnson damping.<sup>12</sup> Additional calculations were performed with spin-coupled scaled second-order Møller-Plesset perturbation theory (SCS-MP2, where singlet excitations are scaled up by 1.2, and triplet excitations down by 1/3, which has previously been shown to perform well for transition metals<sup>13,14</sup>), and coupled cluster with singles, doubles and perturbative triple excitations (CCSD-(T)). Density fitting was employed for DFT and SCS-MP2 calculations.<sup>15</sup> The def2-ATZVPP basis set, from the Molpro basis set library, was used on all elements, alongside the analogous auxiliary basis set for density fitting calculations. This is the def2-TZVPP basis set augmented with one set of diffuse functions,<sup>16,17</sup> and uses the 60 electron quasi-relativistic effective core potential of the

Stuttgart/Cologne Group.<sup>18,19</sup> Calculations were constrained to preserve the four-fold symmetry, *i.e.* D<sub>4h</sub> when eclipsed, D<sub>4d</sub> when staggered and D<sub>4</sub> between. Orbital isosurfaces were generated by IBOView.<sup>20</sup> QTAIM calculations were performed with AIMALL version 17.11.14<sup>21</sup> with .wfx files generated by Molden2AIM.<sup>22</sup>

**Table S1. Z-matrix used for all calculations**

W,  
W, 1, BWW,  
C, 1, BCWeq, 2, ACWWeq,  
C, 1, BCWeq, 2, ACWWeq, 3, Deq, 0  
C, 1, BCWeq, 2, ACWWeq, 4, Deq, 0  
C, 1, BCWeq, 2, ACWWeq, 5, Deq, 0  
C, 1, BCWax, 3, 180.0-ACWWeq, 2, Dax, 0  
O, 1, BOCeq + BCWeq, 2, AOWWeq, 6, Deq, 0  
O, 1, BOCeq + BCWeq, 2, AOWWeq, 8, Deq, 0  
O, 1, BOCeq + BCWeq, 2, AOWWeq, 9, Deq, 0  
O, 1, BOCeq + BCWeq, 2, AOWWeq, 10, Deq, 0  
O, 1, BOCax + BCWax, 3, 180.0-ACWWeq, 2, Dax, 0  
C, 2, BCWeq, 1, ACWWeq, 4, Dspin, 0  
C, 2, BCWeq, 1, ACWWeq, 13, Deq, 0  
C, 2, BCWeq, 1, ACWWeq, 14, Deq, 0  
C, 2, BCWeq, 1, ACWWeq, 15, Deq, 0  
C, 2, BCWax, 13, 180.0-ACWWeq, 15, Dax, 0  
O, 2, BOCeq + BCWeq, 1, AOWWeq, 4, Dspin, 0  
O, 2, BOCeq + BCWeq, 1, AOWWeq, 13, Deq, 0  
O, 2, BOCeq + BCWeq, 1, AOWWeq, 14, Deq, 0  
O, 2, BOCeq + BCWeq, 1, AOWWeq, 15, Deq, 0  
O, 2, BOCax + BCWax, 13, 180.0-ACWWeq, 15, Dax, 0  
[Na, 2, BOCax + BCWax + 4.0, 13, 180.0 - ACWWeq, 15, Dax, 0  
Na, 1, BOCax + BCWax + 4.0, 3, 180.0 - ACWWeq, 2, Dax, 0]\*  
\*B3LYP with explicit Na counter cations only

The following variables were fixed to preserve four-fold symmetry:

Deq= -90.0°  
Dax= 180.0°

Table S2. Energies at the optimized geometries, in Hartree, and energies relative to the staggered ( $D_{4h}$ ,  $DSPIN=45^\circ$ ) geometry, in  $\text{kJ mol}^{-1}$

| DSPIN: | B3LYP                     |                               | B3LYP (Na)                |                               | SCS-MP2                   |                               | CCSD(T)                   |                               |
|--------|---------------------------|-------------------------------|---------------------------|-------------------------------|---------------------------|-------------------------------|---------------------------|-------------------------------|
|        | $E_{\text{el}}/\text{Ha}$ | $\Delta E/\text{kJ mol}^{-1}$ |
| 0      | -1267.805545              | 16.705                        | -1592.160471              | 17.247                        | -1265.085309              | 18.846                        | -1265.359032              | 16.271                        |
| 5      | -1267.805699              | 16.301                        | -1592.160632              | 16.823                        | -1265.085484              | 18.387                        |                           |                               |
| 10     | -1267.806174              | 15.053                        | -1592.161129              | 15.519                        | -1265.085999              | 17.035                        |                           |                               |
| 15     | -1267.806927              | 13.077                        | -1592.161882              | 13.543                        | -1265.086810              | 14.906                        |                           |                               |
| 20     | -1267.807831              | 10.704                        | -1592.162838              | 11.031                        | -1265.087851              | 12.174                        |                           |                               |
| 25     | -1267.808886              | 7.934                         | -1592.163925              | 8.179                         | -1265.089033              | 9.069                         |                           |                               |
| 30     | -1267.809970              | 5.087                         | -1592.165053              | 5.216                         | -1265.090251              | 5.872                         |                           |                               |
| 35     | -1267.810945              | 2.528                         | -1592.166123              | 2.407                         | -1265.091363              | 2.952                         |                           |                               |
| 40     | -1267.811649              | 0.679                         | -1592.166805              | 0.616                         | -1265.092179              | 0.809                         |                           |                               |
| 45     | -1267.811908              | 0.000                         | -1592.167040              | 0.000                         | -1265.092488              | 0.000                         | -1265.365230              | 0.000                         |

Table S3. SCS-MP2 Optimized variables of the dihedral angle scan, at the SCS-MP2 level of theory<sup>a</sup>

| DSPIN                               | 0 <sup>b</sup> | 5         | 10        | 15        | 20        | 25        | 30        | 35        | 40        | 45*       |
|-------------------------------------|----------------|-----------|-----------|-----------|-----------|-----------|-----------|-----------|-----------|-----------|
| <b>BWW</b>                          | 3.207714       | 3.205534  | 3.198146  | 3.186576  | 3.171761  | 3.155722  | 3.139449  | 3.125010  | 3.114489  | 3.110459  |
| <b>BCW<sub>eq</sub></b>             | 2.044314       | 2.044254  | 2.044253  | 2.044267  | 2.044300  | 2.044198  | 2.044118  | 2.044063  | 2.043978  | 2.043899  |
| <b>ACW<sub>W<sub>eq</sub></sub></b> | 88.116673      | 88.064066 | 87.915310 | 87.680933 | 87.358749 | 86.961957 | 86.502715 | 86.025675 | 85.645275 | 85.489581 |
| <b>BCW<sub>wax</sub></b>            | 1.959445       | 1.959674  | 1.960249  | 1.961236  | 1.962430  | 1.963911  | 1.965453  | 1.966856  | 1.967906  | 1.968386  |
| <b>BOC<sub>eq</sub></b>             | 1.166804       | 1.166835  | 1.166917  | 1.167047  | 1.167207  | 1.167384  | 1.167545  | 1.167659  | 1.167725  | 1.167738  |
| <b>AOW<sub>W<sub>eq</sub></sub></b> | 89.109728      | 89.041356 | 88.843500 | 88.530667 | 88.097918 | 87.567329 | 86.950694 | 86.307080 | 85.791849 | 85.580466 |
| <b>BOC<sub>wax</sub></b>            | 1.185489       | 1.185473  | 1.185446  | 1.185401  | 1.185349  | 1.185276  | 1.185209  | 1.185156  | 1.185114  | 1.185096  |

<sup>a</sup> All bond lengths in Å, angles in °. <sup>b</sup> used in CCSD(T) single point calculation.

Table S4. B3LYP 2Na Optimized variables of the dihedral angle scan, at the B3LYP level of theory, with explicit Na counter-cations<sup>a</sup>

| DSPIN         | 0         | 5         | 10        | 15        | 20        | 25        | 30        | 35        | 40        | 45        |
|---------------|-----------|-----------|-----------|-----------|-----------|-----------|-----------|-----------|-----------|-----------|
| <b>BWW</b>    | 3.314492  | 3.313175  | 3.305539  | 3.294024  | 3.279057  | 3.262748  | 3.246023  | 3.230976  | 3.219814  | 3.216735  |
| <b>BCWeq</b>  | 2.055137  | 2.055193  | 2.055189  | 2.055158  | 2.055103  | 2.055038  | 2.054971  | 2.054829  | 2.054785  | 2.054755  |
| <b>ACWWeq</b> | 87.301779 | 87.250715 | 87.121868 | 86.923234 | 86.629732 | 86.299500 | 85.905615 | 85.490037 | 85.196145 | 85.066023 |
| <b>BCWax</b>  | 1.929241  | 1.929309  | 1.929794  | 1.930502  | 1.931502  | 1.932607  | 1.933829  | 1.934963  | 1.935846  | 1.936115  |
| <b>BOCeq</b>  | 1.153515  | 1.153539  | 1.153625  | 1.153754  | 1.153924  | 1.154082  | 1.154227  | 1.154339  | 1.154376  | 1.154386  |
| <b>AOWWeq</b> | 88.288964 | 88.219519 | 88.037124 | 87.759386 | 87.345793 | 86.885413 | 86.333001 | 85.747354 | 85.332721 | 85.150919 |
| <b>BOCax</b>  | 1.186098  | 1.186107  | 1.186108  | 1.186111  | 1.186120  | 1.186130  | 1.186147  | 1.186174  | 1.186184  | 1.186198  |

<sup>a</sup> All bond lengths in Å, angles in °.



*Table S5. B3LYP Optimized variables of the dihedral angle scan, at the B3LYP level of theory*

| <b>DSPIN</b>  | <b>0</b>  | <b>5</b>  | <b>10</b> | <b>15</b> | <b>20</b> | <b>25</b> | <b>30</b> | <b>35</b> | <b>40</b> | <b>45</b> |
|---------------|-----------|-----------|-----------|-----------|-----------|-----------|-----------|-----------|-----------|-----------|
| <b>BWW</b>    | 3.367564  | 3.365385  | 3.357152  | 3.344652  | 3.328927  | 3.311011  | 3.292854  | 3.276094  | 3.264940  | 3.260837  |
| <b>BCWeq</b>  | 2.050460  | 2.050467  | 2.050414  | 2.050375  | 2.050355  | 2.050251  | 2.050192  | 2.050032  | 2.049957  | 2.049918  |
| <b>ACWWeq</b> | 87.074757 | 87.028042 | 86.908714 | 86.713119 | 86.440194 | 86.123182 | 85.741191 | 85.346919 | 85.049774 | 84.954740 |
| <b>BCWax</b>  | 1.957723  | 1.957805  | 1.958353  | 1.959167  | 1.960220  | 1.961453  | 1.962736  | 1.964055  | 1.964969  | 1.965041  |
| <b>BOCeq</b>  | 1.157383  | 1.157407  | 1.157481  | 1.157598  | 1.157731  | 1.157865  | 1.157978  | 1.158056  | 1.158072  | 1.158084  |
| <b>AOWWeq</b> | 87.920528 | 87.856168 | 87.688549 | 87.413078 | 87.026822 | 86.582565 | 86.045523 | 85.488928 | 85.069641 | 84.937037 |
| <b>BOCax</b>  | 1.174288  | 1.174290  | 1.174274  | 1.174259  | 1.174244  | 1.174223  | 1.174221  | 1.174213  | 1.174208  | 1.174231  |

**Table S6. Calculated CO, W-W and imaginary frequencies and IR intensities at the eclipsed  $D_{4h}$  geometry**

|       | $D_{4h}$  | Exp. $\nu$ /<br>irrep $\text{cm}^{-1}$ |       | SCS-MP2                  |                                           | B3LYP                    |                                           | B3LYP 2Na                |                                           |
|-------|-----------|----------------------------------------|-------|--------------------------|-------------------------------------------|--------------------------|-------------------------------------------|--------------------------|-------------------------------------------|
|       |           |                                        |       | $\nu$ / $\text{cm}^{-1}$ | IR<br>intensity /<br>$\text{km mol}^{-1}$ | $\nu$ / $\text{cm}^{-1}$ | IR<br>intensity /<br>$\text{km mol}^{-1}$ | $\nu$ / $\text{cm}^{-1}$ | IR<br>intensity /<br>$\text{km mol}^{-1}$ |
| CO    | $A_{1g}$  | 2019                                   | Raman | 2012.38                  | 0.00                                      | 2069.70                  | 0.00                                      | 2075.77                  | 0.00                                      |
| CO    | $A_{2u}$  | 1937                                   | IR    | 1955.69                  | 1085.36                                   | 1990.13                  | 1085.36                                   | 2009.68                  | 783.08                                    |
| CO    | $B_{1g}$  | 1960                                   | Raman | 1903.10                  | 0.35                                      | 1966.19                  | 0.35                                      | 1988.72                  | 0.00                                      |
| CO    | $E_u$     | 1863                                   | IR    | 1895.74                  | 4368.02                                   | 1954.59                  | 4368.02                                   | 1979.03                  | 3894.70                                   |
| CO    | $B_{1u}$  | -                                      | -     | 1858.37                  | 0.01                                      | 1928.79                  | 0.01                                      | 1952.91                  | 0.00                                      |
| CO    | $E_g$     | 1904                                   | Raman | 1827.38                  | 0.00                                      | 1897.31                  | 0.00                                      | 1924.56                  | 0.00                                      |
| CO    | $A_{1g}$  | 1794                                   | Raman | 1812.19                  | 0.00                                      | 1865.75                  | 0.00                                      | 1808.16                  | 0.00                                      |
| CO    | $A_{2u}$  | 1772                                   | IR    | 1794.88                  | 3258.81                                   | 1850.15                  | 3258.81                                   | 1792.85                  | 3055.36                                   |
| W-W   | $A_{1g}$  | 97                                     | Raman | 100.20                   | 0.01                                      | 88.19                    | 0.01                                      | 91.99                    | 0.00                                      |
| W-W   |           |                                        |       |                          |                                           |                          |                                           |                          |                                           |
| twist | $A_{2g}$  | -                                      | -     | 26.60 <i>i</i>           | -                                         | 26.39 <i>i</i>           | -                                         | 25.63 <i>i</i>           | -                                         |
|       | $A_{1g},$ |                                        |       |                          |                                           |                          |                                           | 65.03 <i>i</i> ,         |                                           |
| Na    | $A_{2u}$  | -                                      | -     | -                        | -                                         | -                        | -                                         | 69.41 <i>i</i>           | -                                         |

**Table S7. Calculated CO, W-W and imaginary frequencies and IR intensities at the staggered  $D_{4d}$  geometry**

|     | $D_{4d}$                       | Exp $\nu$ /<br>irrep $\text{cm}^{-1}$ | SCS-MP2                  |                                           | B3LYP                    |                                           | B3LYP 2Na                          |                                           |
|-----|--------------------------------|---------------------------------------|--------------------------|-------------------------------------------|--------------------------|-------------------------------------------|------------------------------------|-------------------------------------------|
|     |                                |                                       | $\nu$ / $\text{cm}^{-1}$ | IR<br>intensity /<br>$\text{km mol}^{-1}$ | $\nu$ / $\text{cm}^{-1}$ | IR<br>intensity /<br>$\text{km mol}^{-1}$ | $\nu$ / $\text{cm}^{-1}$           | IR<br>intensity /<br>$\text{km mol}^{-1}$ |
| CO  | A <sub>1</sub>                 | 2019 Raman                            | 2011.99                  | 0.07                                      | 2068.69                  | 0.00                                      | 2077.97                            | 0.00                                      |
| CO  | B <sub>2</sub>                 | 1937 IR                               | 1951.85                  | 727.93                                    | 1988.22                  | 1110.72                                   | 2007.39                            | 544.34                                    |
| CO  | E <sub>1</sub>                 | 1863 IR                               | 1893.77                  | 4313.89                                   | 1951.33                  | 4068.49                                   | 1976.63                            | 3871.40                                   |
| CO  | E <sub>2</sub>                 | 1960 Raman                            | 1882.76                  | 0.03                                      | 1947.39                  | 0.00                                      | 1971.00                            | 200.00                                    |
| CO  | E <sub>3</sub>                 | 1904 Raman                            | 1827.56                  | 0.01                                      | 1898.92                  | 0.00                                      | 1926.34                            | 0.01                                      |
| CO  | A <sub>1</sub>                 | 1794 Raman                            | 1809.78                  | 5.21                                      | 1864.71                  | 0.01                                      | 1806.67                            | 0.01                                      |
| CO  | B <sub>2</sub>                 | 1772 IR                               | 1793.60                  | 3692.31                                   | 1848.48                  | 3083.97                                   | 1790.16                            | 3706.87                                   |
| W-W | A <sub>1</sub>                 | 97 Raman                              | 117.49                   | 0.01                                      | 105.37                   | 0.00                                      | 106.47                             | 0.00                                      |
| Na  | A <sub>1</sub> ,B <sub>2</sub> |                                       |                          |                                           |                          |                                           | 64.04 <i>i</i> ,<br>69.31 <i>i</i> |                                           |

## References

1. G. M. Sheldrick, *Acta Cryst. Sect. A*, 2015, **71**, 3.
2. CrysAlisPRO version 39.46, Oxford Diffraction /Agilent Technologies UK Ltd, Yarnton, England.
3. G. M. Sheldrick, *Acta Cryst. Sect. C*, 2015, **71**, 3.
4. O. V. Dolomanov, L. J. Bourhis, R. J. Gildea, J. A. K. Howard, H. Puschmann, *J. Appl. Cryst.*, 2009, **42**, 339.
5. L. J. Farugia, *J. Appl. Cryst.*, 2012, **45**, 849.
6. Persistence of Vision (TM) Raytracer, Persistence of Vision Pty. Ltd., Williamstown, Victoria, Australia.
7. MOLPRO, version 2018.2, a package of ab initio programs, H.-J. Werner, P. J. Knowles, G. Knizia, F. R. Manby, M. Schütz, and others, see <https://www.molpro.net>.
8. A. D. Becke, *J. Chem. Phys.*, 1993, **98**, 5648.
9. C. Lee, W. Yang, R. G. Parr, *Phys. Rev. B*, 1988, **37**, 785.
10. S. H. Vosko, L. Wilk, M. Nusair, *Can. J. Phys.*, 1980, **58**, 1200.
11. J. P. Perdew, K. Burke, M. Ernzerhof, *Phys. Rev. Lett.*, 1996, **77**, 3865.
12. S. Grimme, J. Antony, S. Ehrlich, H. Krieg, *J. Chem. Phys.*, 2010, **132**, 154104.
13. I. Hyla-Kryspin and S. Grimme *Organometallics*, 2004, **23**, 5581-5592.
14. T. Schwabe, Stefan Grimme, and Jean-Pierre Djukic *J. Am. Chem. Soc.*, 2009, **131**, 14156-14157.
15. S. Grimme, J. Antony, S. Ehrlich, H. Krieg, *J. Chem. Phys.*, 2010, **132**, 154104.
16. F. R. Manby, P. J. Knowles, A. W. Lloyd, *J. Chem. Phys.*, 2001, **115**, 9144.
17. H. -J. Werner, F. R. Manby, P. J. Knowles, *J. Chem. Phys.*, 2003, **118**, 8149.
18. F. Weigend, R. Ahlrichs, *Phys. Chem. Chem. Phys.*, 2005, **7**, 3297.
19. F. Weigend, *Phys. Chem. Chem. Phys.*, 2006, **8**, 1057.
20. D. Andrae, U. Haeussermann, M. Dolg, H. Stoll, H. Preuss, *Theor. Chim. Acta*, 1990, **77**, 123.

- *Electronic Supplementary Information* -

21. G. Knizia, J. E. M. N. Klein, *Angew. Chem. Int. Ed.*, 2015, **54**, 5518.
22. AIMAll (Version 17.11.14), T. A. Keith, T. K. Gristmill Software, Overland Park KS, USA, 2019 ([aim.tkgristmill.com](http://aim.tkgristmill.com)).
